# Supplementary material
Source: publisher figshare collection journal article supplement (https://tandf.figshare.com/articles/dataset/_/7605446)

**Figure S4.** Comparison of estimated mean divergence dates from BEAST analyses of data in which third codon positions of mitochondrial genes (*nd4* and *cytb*) are either included or excluded. Nodes C1–C5 are the five calibrated nodes; Node 42 is the divergence between Pareinae and Xylophiinae subfam. nov. Points are plotted for the 57 out of 80 nodes in common between the two BEAST trees (see Fig. S3).

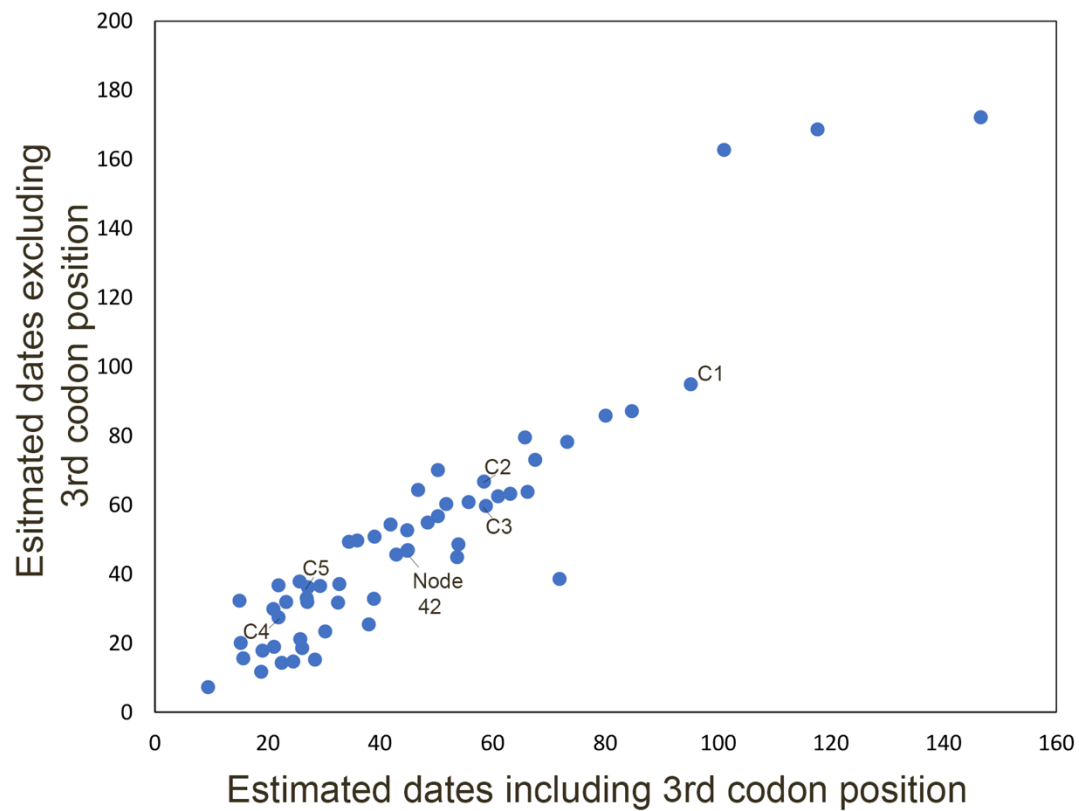

Supplement: Supplementary file 3 [file 1]
