# Supplementary material
Source: publisher figshare collection journal article supplement (https://tandf.figshare.com/articles/dataset/_/7605446)
Supplement: Supplementary file 4 [file 1]

## Supplementary material legends

**Figure S1.** RAxML trees for concatenated data for 81 taxa, with three different alignment treatments for *16s*.

**Figure S2.** RAxML phylogeny highlighting relationships of the genus *Xylophis*.

**Figure S3.** BEAST chronograms generated using concatenated gene sequence data for all sampled families and subfamilies of snakes (81 taxa).

**Figure S4.** Comparison of estimated mean divergence dates from BEAST analyses of data in which third codon positions of mitochondrial genes (*nd4* and *cytb*) are either included or excluded.

**Table S1.** GenBank accession and voucher numbers for gene sequences used in Maximum Likelihood analysis.

**Table S2.** Partitions and models of sequence evolution used in the Maximum Likelihood (ML) phylogenetic analyses.

**Table S3.** Partitions and models of sequence evolution used in the Bayesian (BEAST) phylogenetic analyses.

**Table S4.** Node calibration settings used in the BEAST analysis.

**Table S5.** Pairwise uncorrected genetic distances of *bdnf* gene sequences for 92 taxa. Values in bold are within family/subfamily genetic distances.

**Table S6.** Pairwise uncorrected genetic distances of *cmos* gene sequences for 308 taxa. Values in bold are within family/subfamily genetic distances.

**Table S7.** Pairwise Kimura 2-parameter genetic distances of *bdnf* gene sequences for 92 taxa. Values in bold are within family/subfamily genetic distances.

**Table S8.** Pairwise Kimura 2-parameter genetic distances of cmos gene sequences for 92 taxa. Values in bold are within family/subfamily genetic distances.
