# Supplementary material
Source: publisher figshare collection journal article supplement (https://tandf.figshare.com/articles/dataset/_/7605446)
Supplement: Supplementary file 5 [file 1]

Archive with 6 entries (6 files):
- tnah_a_1557756_sm2079.pdf
- tnah_a_1557756_sm2078.pdf
- tnah_a_1557756_sm2077.pdf
- tnah_a_1557756_sm2076.pdf
- tnah_a_1557756_sm2075.pdf
- tnah_a_1557756_sm2074.xlsx
