# Supplementary material
Source: publisher figshare collection journal article supplement (https://tandf.figshare.com/articles/dataset/_/7605446)
Supplement: Supplementary file 5 [file 1 › tnah_a_1557756_sm2074.xlsx]

## Sheet: TableS1
Table S1. GenBank accession and voucher numbers for gene sequences used in Maximum Likelihood analysis.
sno	Species	CYTB	16s	ND4	CMOS	BDNF	RAG1
1	Acanthophis laevis	AY340138	_	AY340167	_	_	_
2	Acanthophis praelongus	EU547063	EU547161	AY340164	EU546926	_	_
3	Achalinus meiguensis	FJ424614	FJ424614	FJ424614	_	_	_
4	Acrantophis dumerili	EU403574	EU419794	_	EU403581	AY988032	AY988066
5	Acrantophis madagascariensis	U69736	AY336071	_	EU403578	FJ433973	_
6	Acrochordus arafurae	_	_	HM234056	_	_	HM234062
7	Acrochordus javanicus	_	AF512745	HM234055	HM234058	AY988036	HM234061
8	Acutotyphlops kunuaensis	_	_		_	GU902419	_
9	Acutotyphlops subocularis	JQ910524	KF993127	_	_	GU902418	_
10	Adelophis foxi	KF258652	_	KF258635	_	KF258601	_
11	Adelphicos quadrivirgatus	GQ895853	_	_	GQ895796	_	_
12	Afronatrix anoscopus	_	_	AF420076	AF471123	EU402622	EU402832
13	Afrotyphlops punctatus	_	_		_	GU902395	_
14	Agkistrodon contortrix	EU483383	AF156566	AF156577	_	EU402623	EU402833
15	Agkistrodon piscivorus	EU483436	AF057278	AF156578	AF471096	JQ599004	_
16	Ahaetulla mycterizans	KX660479	KX660205	KX660604	KX660345	_	_
17	Ahaetulla pulverulenta	KC347454	KC347339	KC347512	KC347378	_	KC347416
18	Aipysurus apraefrontalis	KC014380	JX423420	JX002981	KC014288	_	_
19	Aipysurus duboisii	JX423393	JX423423	JX423411	FJ587163	_	_
20	Alsophis anomalus	_	FJ666092	_	_	_	_
21	Alsophis antillensis	FJ416726	FJ416702	FJ416800	_	JQ599005	_
22	Alsophis cantherigerus	AF544669	AF158475	_	_	_	_
23	Alsophis portoricensis	_	AF158517	_	_	_	_
24	Amastridium sapperi	GQ334479	_	GQ334580	_	_	_
25	Amastridium veliferum	_	_	_	GQ895797	_	_
26	Amphiesma craspedogaster	JQ687429	_	JQ687412	_	_	_
27	Amphiesma sauteri	AF402905	_	_	_	_	_
28	Amphiesma stolatum	JQ687432	_	JQ687425	KJ685661	EU402624	_
29	Amplorhinus multimaculatus	DQ486340	AY611880	DQ486316	DQ486164	_	_
30	Anilius scytale	U69738	FJ755180	FJ755180	AF544722	EU402625	AY988072
31	Anomochilus leonardi	_	AY953431	_	_	_	_
32	Antaresia childreni	_	EF545058	_	AY099967	_	_
33	Antillophis andreae	_	AF158511	_	_	_	_
34	Antillophis parvifrons	_	AF158510	_	_	JQ599006	_
35	Aparallactus capensis	AY188006	AY188045	FJ404331	AY187967	_	_
36	Aparallactus werneri	AF471035	_	U49315	AF471116	EU402626	_
37	Aplopeltura boa	JF827673	AF544787	JF827650	JF827696	FJ433984	_
38	Apostolepis dimidiata	JQ598917	GQ457725	_	GQ457844	JQ599008	_
39	Arizona elegans	DQ902101	_	DQ902279	DQ902058	_	_
40	Arrhyton dolichura	FJ416721	AF158507	FJ416795	_	_	_
41	Arrhyton exiguum	_	FJ416705	_	_	_	_
42	Aspidelaps lubricus	FR693724	_	_	_	_	_
43	Aspidelaps scutatus	_	AY188046	AY058969	AY187968	_	_
44	Aspidites melanocephalus	U69741	EF545060	_	DQ465557	EU402627	DQ465560
45	Aspidomorphus lineaticollis	_	GQ397237	_	GQ397227	_	_
46	Aspidura ceylonensis	KC347477	KC347361	KC347527	KC347400	_	KC347438
47	Asthenodipsas laevis	KX660468	KX660196	KX660596	KX660335	_	_
48	Asthenodipsas lasgalenensis	KC916763	_	_	_	_	_
49	Asthenodipsas malaccanus	KX660469	KX660197	KX660597	KX660336	_	_
50	Asthenodipsas vertebralis	KC916750	_	_	_	_	_
51	Atheris squamigera	AJ275684	AF544788	EU624212	AF544734	_	_
52	Atractaspis irregularis	_	_		_	JN614212	_
53	Atractaspis micropholis	AY612006	AY611823	FJ404336	AY611915	FJ433994	_
54	Atractus albuquerquei	JQ598918	GQ457726	_	GQ457845	JQ599009	_
55	Atractus wagleri	GQ334480	_	GQ334581	_	_	_
56	Atretium schistosum	KC347487	_	KC347525	KC347383	_	KC347421
57	Atretium yunnanensis	GQ281787	_	JQ687423	JQ687448	_	_
58	Atropoides olmec	AY223585	AY223669	AY223632	_	_	_
59	Atropoides picadoi	AY220324	AF057255	AY220347	_	_	_
60	Austrelaps labialis	EU547077	EU547175	EU547029	EU546939	_	_
61	Austrelaps superbus	EU547078	EU547176	EU547030	EU546940	_	_
62	Azemiops feae	AY352747	AF057234	AY352808	AF544695	EU402628	EU402836
63	Balanophis ceylonensis	KC347474	KC347344	KC347520	KC347384	_	KC347422
64	Bitis nasicornis	DQ305457	AY188048	DQ305475	AY187970	_	KC330012
65	Boa constrictor	AB177354	AB177354	AB177354	AF544676	KC330044	KC347423
66	Bogertophis rosaliae	DQ902102	_	DQ902280	DQ902059	_	_
67	Boiga barnesii	KC347469	KC347345	KC347499	KC347385	_	_
68	Boiga siamensis	KX660527	KX660257	KX660645	KX660398	_	_
69	Borikenophis portoricensis	AF471085	_	FJ416806	AF471126	JQ599012	_
70	Bothriechis schlegeliil	KC847272	KC847257	KC847285	_	FJ433983	_
71	Bothrochilus albertisii	_	_	_	KF811096	KF811059	KF811160
72	Bothrocophias microphthalmus	FR691567	AY223670	FR691540	_	_	_
73	Bothrops leucurus	EU867279	EU867267	AF246283	_	_	_
74	Bothrops lojanus	FR691566	_	FR691536	_	_	_
75	Bothrops lutzi	KF801130	_	KF801261	_	_	_
76	Bothrops oligolepis	_	KX660260	KX660646	_	_	_
77	Brachyophidium rhodogaster	_	AY701023	_	_	_	_
78	Brachyorrhos raffrayi	JX139713	_	_	_	_	_
79	Brachyurophis approximans	_	KF736330	_	_	_	_
80	Brachyurophis semifasciata	EU547057	EU547155	EU547011	EU546921	_	_
81	Buhoma depressiceps	AY612042	AY611860	_	AY611951	_	_
82	Buhoma procterae	AY612001	AY611818	DQ486328	AY611910	_	_
83	Bungarus fasciatus	EU579523	EU579523	EU579523	AY058924	FJ433989	_
84	Caaeteboia amarali	JQ598921	_	_	_	_	_
85	Calabaria reinhardtii	AY099985	Z46494	_	AF544682	EU402631	EU402839
86	Calamaria pavimentata	AF471081	KX694624	_	AF471103	FJ434005	_
87	Calamodontophis paucidens	_	GQ457728	_	GQ457848	_	_
88	Calliophis calligaster	EF137411	_	EF137403	EF137419	_	_
89	Calliophis japonicus	AF217831	_	_	_	_	_
90	Calliophis melanurus	KC347458	KC347351	KC347502	KC347391	_	KC347429
91	Calloselasma rhodostoma	AY223562	AY352718	AY352813	_	_	_
92	Calotes versicolor	AY572870	JX668217	JX857560	JX838985	DQ340705	_
93	Candoia aspera	U69751	EF545068	_	_	_	_
94	Candoia carinata	AY099984	EU419850	_	AY099961	FJ433974	AY988065
95	Caraiba andreae	FJ416743	_	FJ416817	_	_	_
96	Carphophis amoenus	AF471067	AY577022	_	DQ112082	_	_
97	Casarea dussumieri	U69755	AF544827	_	AF544731	EU402632	EU402840
98	Causus defilippi	GU045452	GU045452	AY223617	_	EU402633	_
99	Causus resimus	AY223555	AY223662	AY223616	AF544696	_	_
100	Cemophora coccinea	KF216147	_	DQ902282	AF471132	_	_
101	Cerastes cerastes	AF471028	HQ267811	EU624222	AF544679	_	EU852329
102	Cerberus rynchops	EF395900	EF395851	U49327	EF395925	_	_
103	Cerrophidion barbouri	HM363641	HM363640	HM363642	_	_	_
104	Cerrophidion godmani	AY220328	DQ305442	AY220349	_	_	_
105	Chamaeleo calyptratus	NC12420	HF570443	HF570566	HF570667	GU457847	_
106	Charina bottae	AY099986	AF544816	AF302959	AY099971	FJ433978	AY988076
107	Charina reinhardtii	_	_	AF302943	_	_	_
108	Charina trivirgata	_	GQ200595	AF302944	_	EU402649	EU402852
109	Charina umbratica	KF811115	_	AF302977	KF811099	KF811062	KF811163
110	Chilabothrus striatus	_	_	KC329966	KC329991	KC330056	KC330027
111	Chilomeniscus cinctus	_	_	U49305	_	_	_
112	Chilomeniscus stramineus	GQ895856	_	_	GQ895800	_	_
113	Chionactis occipitalis	GQ895857	_	_	GQ895801	_	_
114	Chironius scurrulus	KX660434	KX660156	KX660560	KX660295	_	_
115	Chironius scurrulus	KX660535	KX660265	_	_	_	_
116	Chrysopelea taprobanica	KC347459	KC347354	KM673290	KC347394	_	KC347432
117	Clelia clelia	GQ895859	AF158472	_	JQ598973	_	_
118	Clonophis kirtlandii	KF258647	_	KF258630	_	KF258596	_
119	Coelognathus radiatus	DQ902121	_	DQ902317	DQ902079	_	_
120	Coluber algirus	_	AY643349	_	_	_	_
121	Coluber constrictor priapus	AY486914	L01770	AY487041	AY486938	EU402634	EU402841
122	Coluber dorri	AY188040	AY188081	AY487042	AY188001	_	_
123	Coluber zebrinus	AY188043	AY188084	AY487058	AY188004	_	_
124	Compsophis albiventris	_	AY188050	FJ404351	AY187972	_	_
125	Compsophis boulengeri	EF203995	EF204007	_	EF204001	_	_
126	Coniophanes fissidens	EF078538	_	EF078586	_	_	_
127	Conophis lineatus	JQ598924	GU018161	_	JQ598975	JQ599016	_
128	Contia tenuis	GU112384	AY577030	GU112419	AF471134	GU112346	_
129	Corallus annulatus	KC750012	_	KC750018	KC750007	JX576167	KC750047
130	Crotaphopeltis hotamboeia	AF428023	_	_	_	_	_
131	Crotaphopeltis tornieri	AF471093	_	_	AF471112	_	_
132	Cryophis hallbergi	GQ334481	_	GQ334582	GQ895807	_	_
133	Cubophis cantherigerus	_	_	FJ416818	AF544694	FJ433999	_
134	Cyclocorinae sp	MG458751	_	_	MG458760	_	_
135	Cyclocorus lineatus	MG458754	_	_	MG458764	_	_
136	Cyclocorus nuchalis	MG458750	_	_	MG458759	_	_
137	Cyclophiops multicinctus	KX660435	KX660157	_	KX660296	_
138	Cylindrophis maculatus	KC347460	KC347355	KC347494	KC347395	_	KC347433
139	Cylindrophis ruffus	AB179619	AB179619	AB179619	AF471133	AY988037	AY988071
140	Daboia russellii	EU913478	EU913478	EU913478	AF471156	EU402636	EU402843
141	Dasypeltis fasciata	KX660463	KX660190	KX660589	KX660328	_	_
142	Deinagkistrodon acutus	EU913476	EU913476	EU913476	_	_	_
143	Demansia vestigiata	EU547045	EU547143	EU547003	AY058927	_	_
144	Dendrelaphis marenae	KX660515	KX660245	_	KX660386	_	_
145	Dendrelaphis tristis	KC347462	KC347359	KC347493	KC347398	_	KC347436
146	Dendroaspis angusticeps	_	FJ404194	JF357927	AF544735	FJ433988	_
147	Dendroaspis jamesoni	KX660464	KX660191	KX660590	KX660329	_	_
148	Dendroaspis polylepis	FJ404295	_	AY058974	FJ387197	_	_
149	Dendrophidion dendrophis	GQ895865	_	_	GQ895809	_	_
150	Dendrophidion percarinatum	KX660556	KX660291	KX660667	KX660431	_	_
151	Dendrophidion percarinatus	_	HM582217	_	HQ157822	_	_
152	Denisonia devisi	EU547071	EU547169	EU547023	EU546933	_	_
153	Diadophis punctatus	AF471094	AF544793	EU194091	AF471122	EU402637	_
154	Dinodon rufozonatum	AF471063	HM439982	KF732917	JF827695	JQ599018	_
155	Dipsadoboa brevirostris	_	KX660285	KX660661	KX660424	_	_
156	Dipsadoboa duchesnii	KX660453	KX660180	_	KX660319	_	_
157	Dipsas catesbyi	JQ598926	Z46496	_	JQ598977	JQ599021	_
158	Dipsas peruana	KX660538	KX660269	_	KX660406	_	_
159	Dipsas pratti	GQ334482	_	GQ334583	_	_	_
160	Ditypophis sp.	_	_		_	JQ073079	JQ073200
161	Drymarchon corais	AF471064	HM582218	DQ902314	AF471137	_	_
162	Drymobius rhombifer	GQ927320	HM582220	_	GQ927313	_	_
163	Drymoluber dichrous	GQ895869	HM582221	_	HQ157824	_	_
164	Dryophiops philippina	KX660517	KX660247	KX660641	KX660388	_	_
165	Echinanthera undulata	JQ598929	JQ598870	_	JQ598978	JQ599022	_
166	Echiopsis atriceps	EU547080	EU547178	EU547032	EU546942	_	_
167	Echiopsis curta	EU547072	EU547170	EU547024	EU546934	_	_
168	Echis carinatus	GQ359436	GQ359685	GQ359524	_	_	EU852325
169	Eirenis modestus	AY486933	AY376792	AY487072	AY486957	_	_
170	Elaphe bella	DQ902134	_	DQ902316	DQ902097	_	_
171	Elaphe poryphyracea	_	GQ181130	GQ181130	_	_	_
172	Elaphe quatuorlineata	AY486931	AF215267	AY487067	AY486955	_	_
173	Elapognathus coronata	EU547069	EU547167	EU547021	EU546931	_	_
174	Elapomorphus quinquelineatus	JQ598930	GQ457735	_	GQ457855	JQ599023	_
175	Elapsoidea nigra	AF217820	_	AY058975	AY058930	_	_
176	Elapsoidea semiannulata	AF039260	JF357946	JF357928	AF544678	FJ433987	_
177	Elgaria multicarinata	AF361528	AY649151	DQ364660	AF039479	GU457854	GU457977
178	Emydocephalus annulatus	DQ233940	DQ234001	FJ593196	FJ587172	_	_
179	Enhydris dussumieri	JX463014	JX463016	_	JX463012	_	_
180	Enhydris enhydris	EF395904	EF395855	GU997190	EF395929	_	_
181	Enhydris plumbea	EF395910	EF395861	U49328	EF395934	_	_
182	Enulius sp.	GQ895870	_	_	GQ895813	_	_
183	Ephalophis greyae	JX002976	FJ587208	FJ593197	FJ587173	_	_
184	Epicrates cenchria	HQ399501	_	KC329975	KC330008	KC330073	_
185	Epicrates striatus	U69791	_	_	_	_	_
186	Eristicophis macmahoni	AJ275711	EU624293	EU624227	_	_	_
187	Erythrolamprus aesculapii	GQ895871	GQ457736	_	GQ895814	JQ599024	_
188	Eryx colubrinus	U69811	AF544819	_	AF544716	EU402639	DQ465571
189	Eunectes notaeus	HQ399499	AM236347	KC329978	HQ399536	KC330076	HQ399516
190	Euprepiophis mandarinus	DQ902115	_	DQ902294	DQ902073	_	_
191	Euprepiophis perlacea	KF669239	KF850472	KF850472	_	_	_
192	Exallodontophis albignaci	EU394724	_	_	_	_	_
193	Exiliboa placata	AY099989	AF512742	_	AY099973	EU402640	AY988068
194	Farancia abacura	U69832	Z46491	U49307	AF471141	_	KR814740
195	Furina diadema	EU547053	EU547151	EU547008	EU546917	_	_
196	Furina ornata	EU547054	EU547152	EU547009	EU546918	_	_
197	Geophis carinosus	GQ895872	_	_	GQ895815	_	_
198	Geophis godmani	JQ598932	JQ598877	_	_	JQ599026	_
199	Gloydius brevicaudus	JQ687496	_	JQ687477	JQ687515	_	_
200	Gloydius halys	AY223564	AF057238	JQ356856	_	_	_
201	Gomesophis brasiliensis	_	GQ457737	_	_	_	_
202	Gonionotophis capensis	_	AF544798	_	AF544703	FJ433995	_
203	Gonyosoma oxycephalum	AF471084	Z46490	DQ902309	KC010302	_	_
204	Grayia ornata	_	AF158503	AF544663	AF544684	FJ434002	_
205	Hapsidophrys smaragdina	AY612057	AY611875	_	DQ112078	FJ434003	_
206	Hebius craspedogaster	_	_	_	KJ685622	_	_
207	Hebius sauteri	_	_	_	KJ685651	_	_
208	Helicops angulatus	AF471037	GQ457738	_	AF471160	JQ599027	_
209	Helicops infrataeniatus	JQ598933	GQ457740	_	GQ457859	_	_
210	Helicops pictiventris	_	_	U49310	_	_	_
211	Heloderma suspectum	NC8776	NC_8776	NC_8776	AY487348	GU457856	GU457979
212	Hemachatus haemachatus	AF217821	_	_	_	_	_
213	Hemerophis socotrae	AY188042	AY188083	AY487055	AY188003	_	_
214	Hemiaspis damelii	EU547073	DQ233979	FJ593193	FJ587161	_	_
215	Hemiaspis signata	EU547074	DQ233980	EU547026	EU546936	_	_
216	Hemorrhois algirus	AY486911	_	AY487037	AY486935	_	_
217	Herpetoreas platyceps	KJ685690	_	_	KJ685640	_	_
218	Heterodon platirhinos	GU112412	AY577028	AF402659	JQ598986	JQ599028	_
219	Hierophis jugularis	AY486917	AY376769	AY487046	AY486941	_	_
220	Hierophis spinalis	AY486924	AY376773	AY487056	AY486948	_	_
221	Hologerrhum philippinum	MG458758	_	_	MG458766	_	_
222	Homoroselaps lacteus	AY611992	AY611809	FJ404338	AY611901	JQ599029	_
223	Hoplocephalus bitorquatus	EU547079	EU547177	EU547031	EU546941	_	_
224	Hormonotus modestus	FJ404296	FJ404195	FJ404360	FJ404261	_	_
225	Hydrelaps darwiniensis	KC014413	DQ234046	FJ593200	FJ587175	_	_
226	Hydrodynastes bicinctus	JQ598935	GQ457742	_	GQ457862	JQ599030	_
227	Hydromorphus concolor	GQ895874	_	_	GQ895817	_	_
228	Hydrophis lamberti	KC014421	KC014345	KC014496	KC014300	_	_
229	Hydrops triangularis	_	GQ457744	_	AF471158	JQ599032	_
230	Hypnale zara	KC347463	KC347363	KC347513	KC347402	_	KC347440
231	Hypsiglena affinis	_	_	EU363055	_	_	_
232	Hypsiglena chlorophaea	KJ486459	KF548588	EU728577	_	_	_
233	Hypsiglena torquata	AF471038	_	GQ334584	AF471159	_	_
234	Hypsirhynchus ferox	GQ895875	AF158515	FJ416816	GQ895818	_	_
235	Hypsirhynchus parvifrons	FJ416740	_	FJ416814	_	_	_
236	Ialtris dorsalis	FJ416735	AF158525	FJ416809	_	_	_
237	Imantodes cenchoa	GQ334484	GQ457745	GQ334589	GQ457865	EU402643	EU402847
238	Indotyphlops braminus	DQ343649	_	_	AF544717	FJ433959	_
239	Lachesis stenophrys	AY223603	AF057267	U96026	_	EU402644	_
240	Lampropeltis getula	AF337153	_	DQ360485	_	_	_
241	Lampropeltis ruthveni	AF337064	_	AY739641	FJ627803	_	_
242	Lamprophis fuliginosus	AF471060	AY188079	FJ404365	FJ404270	EU402646	EU402849
243	Langaha madagascariensis	_	AY188059	FJ404370	AY187981	_	_
244	Laticauda colubrina	EU547040	EU547138	FJ606513	EU366446	FJ433990	_
245	Laticauda frontalis	_	FJ587206	FJ593190	FJ587157	_	_
246	Laticauda guineai	_	_	FJ606516		_	_
247	Laticauda laticaudata	FJ587153	FJ587204	FJ593192	FJ587159	_	_
248	Laticauda saintgironsi	_	_	FJ606506		_	_
249	Laticauda semifasciata	AB701339	_	_	_	_	_
250	Leiopython albertisii	_	EF545053	_	_	_	_
251	Leptodeira annulata	GQ334493	GQ457746	GQ334594	AF544690	FJ433998	_
252	Leptophis depressirostris	KX660465	_	KX660592	KX660331	_	_
253	Leptophis diplotropis	KX660540	KX660271	_	KX660408	_	_
254	Leptotyphlops conjunctus	_	GQ469280	_	GQ469069	GQ469184	_
255	Leptotyphlops humilis	_	_		_	EU402648	EU402851
256	Lepturophis albofuscus	KX660500	KX660231	KX660629	KX660372	_	_
257	Liasis albertisii	U69835	_	_	_	_	_
258	Liasis childreni	U69837	_	_	_	_	_
259	Liasis mackloti	U69839	EF545051	_	AF544726	FJ433970	_
260	Lichanura trivirgata	U69844	_	_	AF544687	_	_
261	Liolaemus darwinii	KC150152	_	DQ237768	JF272870	KP820851	KP820640
262	Liopeltis frenatus	KX660457	KX660184	KX660583	KX660323	_	_
263	Liophidium chabaudi	EU394721	FJ404210	FJ404372	FJ387210	_	_
264	Liophis amarali	_	GQ457747	_	GQ457867	_	_
265	Liophis lineatus	_	_	_	DQ469789	DQ469795	DQ469791
266	Liophis meridionalis	_	GQ457750	_	GQ457870	_	_
267	Liopholidophis sexlineatus	DQ979985	AY188063	FJ404373	AY187985	_	_
268	Liotyphlops albirostris	AF544672	AF366762	_	AF544727	EU402650	EU402853
269	Loxocemus bicolor	AY099993	AF544828	_	AY444035	EU402651	_
270	Lycodonomorphus whytii	FJ404300	FJ404200	FJ404375	FJ387201	_	_
271	Lycodryas citrinus	_	_	HE798413	_	JQ073076	JQ073197
272	Lystrophis histricus	_	GQ457753	_	_	_	_
273	Lytorhynchus diadema	DQ112076	HQ267794	_	DQ112079	_	_
274	Macrelaps microlepidotus	AY611993	AY611810	FJ404340	AY611902	_	_
275	Macropisthodon rhodomelas	KX660528	KX660258	JQ687427	KX660399	_	_
276	Macropisthodon rudis	JQ687434	_	AY487064	JQ687452	_	_
277	Macroprotodon cucullatus	AF471087	AY188065	_	AF471145	_	_
278	Macrovipera lebetina	AJ275713	EU624294	DQ897729	_	_	_
279	Magliophis exiguum	AF471071	_	FJ416798	AF471117	_	_
280	Malayopython reticulatus	U69860	EF545062	_	AF544675	FJ433969	EU624119
281	Malpolon moilensis	DQ486333	HQ267802	DQ486309	DQ486157	_	_
282	Manolepis putnami	GQ895878	GU018171	_	GQ895820	JQ599035	_
283	Mastigodryas bifossatus	_	HM582223	_	HQ157827	_	_
284	Mastigodryas boddaerti	GQ895867	HM582224	_	GQ895811	_	_
285	Mastigodryas melanolomus	GQ895868	_	_	_	_	_
286	Mehelya capensis	HQ207116	_	HQ207158	_	_	_
287	Melanophidium punctatum	_	AY701024	_	_	_	_
288	Micrelaps bicoloratus	DQ486349	_	_	DQ486173	_	_
289	Microcephalophis gracilis	KC014420	KC014341	KC014494	KC014299	_	_
290	Micropechis ikaheka	EU547042	FJ587207	GQ397208	EU366449	_	_
291	Micruroides euryxanthus	EF137416	Z46483	EF137408	EF137423	_	_
292	Micrurus fulvius	U69846	GU045453	GU045453	AY058935	EU402653	EU402856
293	Micrurus surinamensis	EF137415	AF544799	JF308709	AF544708	FJ433991	_
294	Mitophis asbolepis	GQ469086	GQ469210	_	GQ469059	GQ469174	_
295	Montivipera wagneri	_	_	JN870213	_	_	_
296	Morelia boeleni	_	EF545047	_	_	_	_
297	Morelia bredli	KJ666638	EF545043	_	_	_	_
298	Morelia carinata	EF545095	EF545044	_	_	_	_
299	Morelia viridis	EF545098	EF545048	_	_	_	_
300	Myersophis alpestris	MG458752	_	_	MG458762	_	_
301	Myriopholis adleri	_	GQ469246	_	GQ469058	GQ469172	_
302	Naja haje arabica	GQ359500	GQ359749	GQ387074	_	_	_
303	Naja kaouthia	FR693728	GQ359757	EU624209	AY058938	EU402654	EU402857
304	Namibiana occidentalis	_	GQ469251	_	GQ469074	GQ469189	_
305	Natriciteres olivacea	AF471058	AF544801	_	AF471146	_	_
306	Natrix natrix	AY487749	_	AY487794	AF544697	EU402655	EU402858
307	Neelaps calonotus	EU547060	EU547158	EF210841	EU546923	_	_
308	Nerodia erythrogaster	AF402912	_	AF420084	JN090137	_	_
309	Nerodia fasciata	AF402910	_	AY873705	_	KF258597	_
310	Ninia atrata	JQ598937	JQ598882	GQ334659	GQ457874	JQ599037	_
311	Ninia sebae	GQ895879	_	_	GQ895821	_	_
312	Notechis ater	EU547082	EU547180	EU547034	EU546944		_
313	Notechis scutatus	_	_	_	_	EU402656	EU402859
314	Oligodon arnensis	KC347464	KC347365	KC347504	KC347404	_	KC347442
315	Oligodon ningshaanensis	KJ638715	NC_26083	KJ719252	KJ638717	_	_
316	Oligodon theobaldi	_	HM591515	_	_	_	_
317	Oocatochus rufodorsatus	KC990020	KC990020	DQ902301	DQ902081	_	_
318	Ophiophagus hannah	EU921899	JN687931	EU921899	AY058940	_	_
319	Ophryacus undulatus	AY223586	AF057256	AY223633	_	_	_
320	Opisthotropis cheni	GQ281779	_	JQ687416	JQ687441	_	_
321	Oreocryptophis porphyraceus	KF669255	_	_	DQ902076	_	_
322	Orthriophis hodgsonii	DQ902136	_	DQ902318	DQ902096	_	_
323	Orthriophis taeniurus taeniura	EF076709	HM439981	DQ902305	DQ902085	_	_
324	Ovophis chaseni	AY352760	AY352729	AY352825	_	_	_
325	Ovophis okinavensis	AB175670	AB175670	AB175670	_	_	_
326	Oxybelis aeneus	AF471056	HM582225	_	AF471148	_	_
327	Oxyrhabdium leporinum	AF471029	_	_	DQ112081	_	_
328	Oxyrhopus fitzingeri	KX660541	KX660272	_	KX660409	_	_
329	Oxyrhopus guibei	JQ598938	JQ627289	_	JQ598989	JQ599038	_
330	Oxyrhopus trigeminus	_	KX660274	KX660653	_	_	_
331	Oxyuranus scutellatus	EU547051	EU547149	EF210827	EU546916	_	_
332	Pantherophis guttatus	AM236349	AM236349	AM236349	DQ902070	_	_
333	Parahydrophis mertoni	KC014451	DQ234048	FJ593201	FJ587177	_	_
334	Parastenophis betsileanus	GU994802	GU994852	_	GU994827	_	_
335	Pareas boulengeri	JF827683	_	_	JF827710	_
336	Pareas carinatus	JF827677	AF544802	JF827653	JF827702	FJ433985	_
337	Pareas formosensis	HQ528535	_	HQ528434	KJ642213	_
338	Pareas hamptoni	KX694896	KX694656	_	_	KX694746	_
339	Pareas iwasakii	KJ642160	_	_	KJ642209	_	_
340	Pareas margaritophorus	AY425805	_	_	KJ642217	_	_
341	Pareas monticola	JF827689	_	_	JF827715	_	_
342	Pareas nuchalis	_	_	U49311	_	_	_
343	Pareas stanleyi	JN230704	_	JN230705	JN230703	_	_
344	Phalotris lemniscatus	JQ598941	GQ457756		GQ457877	JQ599039	_
345	Philodryas chamissonis	_	_	HM639951	_	_	_
346	Philothamnus natalensis	KX660555	KX660290	KX660666	KX660430	_	_
347	Philothamnus natalensis2	AY612069	AY611887	_		_	_
348	Phyllorhynchus decurtatus	AF471083	_	_	AF544728	FJ434004	_
349	Pituophis catenifer	_	_	AF141106	FJ627790	_	_
350	Pituophis lineaticollis	_	AF512746	JF308340	FJ627804	_	_
351	Pituophis melanoleucus	AF337112	_	_	_	_	_
352	Plagiopholis styani	EU496918	_	_	EU496916	_	_
353	Platyceps karelini	AY486918	_	_	AY486942	_	_
354	Platyceps rogersi	_	AY188082	AY487052	_	_	_
355	Pliocercus elapoides	GQ895882	_	_	GQ895824	_	_
356	Pliocercus euryzona	KX660440	KX660165	KX660568	KX660304	_	_
357	Porthidium yucatanicum	DQ061215	JN870198	DQ061244	_	_	_
358	Proatheris superciliaris	AJ275685	EU624296	EU624230	_	_	_
359	Prosymna janii	FJ404319	FJ404222	FJ404389	FJ404293	_	_
360	Protobothrops mangshanensis	HM567537	AY352726	HM567469	JQ687524	_	_
361	Psammodynastes pictus	KX660507	KX660237	_	KX660378	_	_
362	Psammodynastes pulverulentus	AF471031	AF544813	_	AF471157	_	_
363	Psammodynastes sp.	FJ404318	FJ404221	FJ404383	FJ387218	_	_
364	Psammophis schokari	AY612034	AY611852	EF128005	AY611943	_	_
365	Psammophis sp.	DQ486444	_	DQ486280	DQ486184	_	_
366	Pseudalsophis dorsalisial	JQ598946	JQ598892	_	JQ598994	_	_
367	Pseudalsophis elegans	_	_	_	_	JQ599042	_
368	Pseudaspis cana	AY612080	AY611898	DQ486319	DQ486167	_	_
369	Pseudechis australis	EU547046	EU547144	AY340174	EU546912	_	_
370	Pseudechis porphyriacus	EU547047	EU547145	AY340170	EU546913	_	_
371	Pseudoboa nigra	JQ598948	GQ457764	_	AF544729	JQ599043	_
372	Pseudocerastes fieldi	AJ275716	AJ275769	_	_	_	_
373	Pseudoeryx plicatilis	GQ895885	GQ457765	_	GQ895826	_	_
374	Pseudoficimia frontalis	GQ895886	_	_	GQ895827	_	_
375	Pseudoleptodeira latifasciata	EU728579	EU728579	GQ334661	_	_	_
376	Pseudonaja modesta	EU547049	EU547147	DQ098492	EU546915	_	_
377	Pseudorabdion longiceps	KX660529	KX660259	_	KX660400	_	_
378	Pseudotomodon trigonatus	_	GQ457766	_	GQ457887	_	_
379	Pseudoxenodon karlschmidti	AF471080	JF697330	_	AF471102	JQ599045	_
380	Pseustes poecilonotus	KX660436	KX660160	KX660563	KX660299	_	_
381	Pseustes poecilonotus2	KF669676	_	KF669693	KF669710	_	_
382	Pseustes poecilonotus3	KF669671	_	KF669687	KF669705	_	_
383	Psomophis joberti	GQ895887	GQ457768	_	GQ895828	JQ599046	_
384	Ptyas mucosus	AF471054	KC589121	AY487063	GQ225670	_	_
385	Ptychophis flavovirgatus	_	GQ457769	_	GQ457890	_	_
386	Python bivittatus	JX401131	KF010492	_	AF435016	XM7433022	_
387	Pythonodipsas carinata	_	AY188075	FJ404386	AY187997	_	_
388	Ramphotyphlops acuticauda	JQ910543	_	_	_	GU902381	_
389	Ramphotyphlops australis	JQ910537	AY442843	_	AF039474	JQ910312	_
390	Ramphotyphlops braminus	DQ343649	DQ343649	DQ343649	_	_	AY662612
391	Regina grahami	AF402918	_	KF258633	_	KF258599	_
392	Regina rigida	AF471052	_	KF258642	AF471120	KF258608	_
393	Regina septemvittata	AF402917	_	KF258629	_	KF258595	_
394	Rena humilis	AY099991	AB079597	AB079597	AY099979	_	_
395	Rhabdophis nuchalis	GQ281786	_	JQ687413	KF800925	_	_
396	Rhabdophis subminiatus	GQ281777	AF544805	JQ687411	AF544713	JQ599047	_
397	Rhadinaea flavilata	AF471078	_	_	AF471152	_	_
398	Rhamphiophis oxyrhynchus	JQ598953	FJ404213	_	AF544710	JQ599049	_
399	Rhinobothryum lentiginosum	_	HM582227	_	AF544693	_	_
400	Rhinocheilus lecontei	AF337109	_	AF138773	FJ627788	_	_
401	Rhinoleptus sp.	_	GQ469242	_	GQ469078	GQ469193	_
402	Rhinophis drummondhayi	AF544673	AY701028	_	AF544719	FJ433966	_
403	Rhinophis erangaviraji	KC347490	KC347371	KC347503	KC347410	_	KC347448
404	Rhinoplocephalus bicolor	EU547068	EU547166	EU547020	EU546930	_	_
405	Rhinoplocephalus nigrescens	EU547070	EU547168	EU547022	EU546932	_	_
406	Rhinotyphlops episcopus	_	_	_	_	KC848449	_
407	Rhinotyphlops lalandei	_	_	_	_	GU902386	_
408	Sanzinia madagascariensis	U69866	AY336066	_	EU403580	AY988033	AY988067
409	Scaphiodontophis annulatus	GQ927323	_	_	GQ927318	_	_
410	Scaphiophis albopunctatus	DQ486345	_	DQ486321	DQ486169	_	_
411	Senticolis triaspis	DQ902127	_	AF138775	DQ902086	_	_
412	Siagonodon septemstriatus	_	GQ469232	_	GQ469076	GQ469191	_
413	Sibon annulatus	KX660443	KX660169	KX660572	KX660308	_	_
414	Sibon nebulatus	EU728583	AF544806	GQ334662	AF544736	_	_
415	Sibon sartorrii	EF078540	_	EF078588	_	_	_
416	Sibynomorphus garmani	_	_	_	GQ457891	_	_
417	Sibynomorphus mikaniirial	JQ598954	JQ627298	_	_	JQ599050	_
418	Sibynomorphus turgidus	KX660547	KX660279	KX660659	KX660418	_	_
419	Sibynophis subpunctatus	KC347471	KC347373	KC347516	KC347411	_	KC347449
420	Simalia boeleni	KJ666597	_	_	KF811106	KF811070	_
421	Simoselaps anomalus	EU547061	EU547159	EU547014	EU546924	_	KF811168
422	Sinomicrurus japonicus	_	_	AY058971	AY058926	_	_
423	Sinonatrix annularis	JQ687431	HM439988	JQ687424	AF544712	_	_
424	Siphlophis cervinus	GQ895888	AF158536	_	GQ895829	_	_
425	Sistrurus catenatus	AY223610	AF259119	_	KF410311	_	_
426	Sordellina punctata	JQ598956	JQ598903	_	JQ599000	JQ599052	_
427	Spilotes pullatus	AF471041	HM582228	KF669677	AF471110	_	_
428	Spilotes sulphureus	KX660545	KX660276	KX660656	KX660415	_	_
429	Stenophis betsileanus	_	_	FJ404387	_	_	_
430	Stenophis citrinus	AY612047	AY611865	KF258627	AY611956	_	_
431	Stenorrhina freminvillei	GQ895889	_	_	GQ895830	_	_
432	Stoliczkia borneensis	_	AF544808	_	AF544721	FJ433982	_
433	Storeria dekayi	AF471050	JQ598904	_	AF471154	KF258593	_
434	Suta fasciata	EU547064	EU547162	EU547016	EU546927	_	_
435	Suta monachus	EU547067	EU547165	EU547019	EU546929	_	_
436	Suta spectabilis	EU547065	EU547163	EU547017	EU546928	_	_
437	Suta suta	EU547066	EU547164	EU547018	EU366452	_	_
438	Sympholis lippiens	GQ895890	_	_	GQ895831	_	_
439	Tachymenis peruviana	_	GQ457774	_	GQ457895	JQ599054	_
440	Taeniophallus affinis	JQ598957	GQ457733	_	GQ457853	JQ599055	_
441	Tantalophis discolor	EF078541	_	EF078589	_	_	_
442	Tantilla melanocephala	_	AF158491	_	_	_	_
443	Tantilla relicta	AF471045	_	_	AF471107	_	_
444	Telescopus beetzi	KX660551	KX660287	KX660663	KX660426	_	_
445	Telescopus fallax	AF471043	AY188078	_	AF471108	_	_
446	Thamnodynastes hypoconia	KX660523	KX660253	KX660643	KX660394	_	_
447	Thamnodynastes pallidus	GQ895891	GU018166	_	GQ895832	_	_
448	Thamnodynastes strigatus	_	KX660281	_	KX660420	_	_
449	Thamnophis butleri	AF402923	_	KF258628	_	KF258594	_
450	Thamnophis godmani	_	_	AF420138	AF471165	_	_
451	Thamnophis sirtalis	_	_	_	_	_	XM014075835
452	Thelotornis capensis	AF471042	_	_	AF471109	_	_
453	Thelotornis kirtlandii	KX660466	KX660193	KX660593	KX660332	_	_
454	Thermophis zhaoermii	GQ166168	GQ166168	EU864150	KF514882	_	_
455	Thrasops flavigularis	_	KX660286	KX660662	KX660425	_	_
456	Thrasops jacksonii	AF471044	_	_	DQ112084	_	_
457	Tomodon dorsatus	GQ895892	GQ457777	_	GQ895833	JQ599059	_
458	Toxicocalamus loriae	GQ397170	GQ397235	GQ397211	GQ397225	_	_
459	Toxicocalamus preussi	EU547043	EU547141	EU547001	EU546909	_	_
460	Toxicodryas blandingii	KX660549	KX660283	_	KX660422	_	_
461	Toxicodryas pulverulenta	KX660460	KX660187	_	AF471118.2	_	_
462	Toxicodryas pulverulenta	AF471047	_	KX660586	_	_	_
463	Trachischium monticola	JQ687435	_	JQ687428	JQ687453	_	_
464	Trimeresurus albolabris	KF311102	KF311102	AY352837	_	_	_
465	Trimeresurus nebularis	KX660506	KX660236	KX660634	KX660377	_	_
466	Trimeresurus trigonocephalus	KC347479	KC347374	AY059597	KC347412	_	_
467	Trimorphodon biscutatus	GQ927324	_	DQ497506	GQ927319	EU402662	EU402864
468	Tropidechis carinatus	EU547081	EU547179	EU547033	EU546943	_	_
469	Tropidoclonion lineatum	AF402931	_	KF258638	_	KF258604	_
470	Tropidodipsas fischeri	KX660553	KX660289	KX660664	KX660428	_	_
471	Tropidodryas striaticeps	AF236811	GQ457778	_	_	JQ599060	_
472	Tropidolaemus subannulatus	KX660525	KX660255	KX660644	KX660396	_	_
473	Tropidolaemus wagleri	GQ428472	AY352727	AY352822	_	_	_
474	Tropidophis feicki	KF811124	AF512733	_	KF811110	KF811074	_
475	Tropidophis wrighti	_	Z46476	_	_	_	_
476	Tropidurus plica	EF616028	EF615664	EF616320	EF615737	JF806028	JF806213
477	Typhlops andasibensis	_	_	_	_	GU902453	JQ073249
478	Typhlops diardii	_	_	_	_	KF992877	_
479	Typhlops jamaicensis	KF993259	AF366764	_	AF544733	EU402664	EU402866
480	Typhlops luzonensis	_	AF366763	_	_	GU902393	_
481	Typhlops mirus	AM236345	AM236345	AM236345	_	GU902394	_
482	Typhlops reticulatus	EU747730	EU747730	EU747730	_	GU902396	_
483	Typhlops ruber	_	AF512728	_	_	_	_
484	Typhlops sulcatus	KF993280	AF366771	_	_	GU902441	_
485	Typhlops vermicularis	JQ910544	_	_	_	GU902397	_
486	Ungaliophis continentalis	U69870	AF544833	_	AF544724	EU402665	EU402867
487	Ungaliophis panamensis	KX660445	KX660171	KX660574	KX660310	_	_
488	Uromacer catesbyi	FJ416714	AF158523	FJ416788	_	_	_
489	Varanus salvator	EU621812	EU621807	AY033776	AF435017	EU402618	EU402828
490	Vipera ammodytes	DQ186504	EU624297	EU624232	_	_	_
491	Vipera wagneri	AJ275725	AJ275778	_	_	_	_
492	Virginia striatula	KF258657	_	KF258640	_	KF258606	_
493	Virginia valeriae	KF258656	_	KF258639	KP765645	KF258605	_
494	Walterinnesia aegyptia	_	HQ267785	AY058988	AY058943	_	_
495	Xylophis captaini	xxx	xxx	xxx	xxx	xxx	_
496	Xylophis perroteti	_	xxx	_	xxx	xxx	xxx
497	Xylophis stenorhynchus	_	xxx	_	xxx	xxx	_
498	Xenochrophis asperrimus	_	_	_	_	_	KC347451
499	Xenochrophis flavipunctatus	_	AF544809	_	AF544714	FJ434001	_
500	Xenodermus javanicus	_	AF544810	U49320	AF544711	EU402667	EU402869
501	Xenodon histricus	JQ598962	_	_	_	JQ599061	_
502	Xenopeltis unicolor	AB179620	AB179620	AB179620	AF544689	EU402668	DQ465564
503	Xenophidion schaeferi	AY574279	_	_	_	_	_
504	Xenopholis scalaris	GQ895897	GU018164	_	GQ895837	_	_
505	Xenotyphlops grandidieri	KF770844	_	_	_	GU902457	_
506	Xenoxybelis argenteus	JQ598944	GQ457780	_	GQ457899	JQ599040	_
507	Zamenis hohenackeri	DQ902137	_	DQ902320	DQ902098	_	_

## Sheet: TableS2
Table S2. Partitions and models of sequence evolution used in the Maximum Likelihood (ML)
	phylogenetic analyses.
Subset	Best Model	# sites	Partition names
1	GTR+I+G	582	16s
2	K80+I+G	528	bdnf 1st, rag1 2nd
3	K80+I	233	bdnf 2nd
4	K80+I+G	233	bdnf 3rd
5	GTR+I+G	233	nd4 1st
6	GTR+I+G	600	nd4 2nd, cytb 2nd
7	GTR+G	233	nd4 3rd
8	HKY+I+G	690	rag1 1st, cmos 2nd, cmos 1st
9	GTR+G	491	cmos 3rd, rag1 3rd
10	GTR+I+G	367	cytb 1st
11	GTR+G	367	cytb 3rd

## Sheet: TableS3
Table S3. Partitions and models of sequence evolution used in the Bayesian (BEAST)
	phylogenetic analyses.
Subset	Best Model	# sites	Partition names
1	GTR+I+G	529	16s
2	K80+G	233	bdnf 1st
3	HKY+I+G	759	bdnf 3rd, bdnf 2nd, rag1 2nd
4	GTR+I+G	600	cytb 1st, nd4 1st
5	GTR+I+G	600	nd4 2nd, cytb 2nd
6	GTR+I+G	600	cytb 3rd, nd4 3rd
7	HKY+G	690	cmos 1st, cmos 2nd, rag1 1st
8	HKY+G	491	rag1 3rd, cmos 3rd

## Sheet: TableS4
Table S4. Node calibration settings used in the BEAST analysis.
S.no.	Node calibrations	Offset	mean	0.05	0.95
1	Oldest divergence within crown Alethinophidia	93.9	2	94.1	100.2
2	Oldest divergence between non-xenodermid colubroids and their closest living relative	50.5	6	51.2	69.35
3	Divergence between Boinae and its sister taxon	58	2	58.2	64.3
4	Divergence between Viperinae and Crotalinae	20	1	20.1	23.1
5	Oldest divergence within elapids	17	10	18.2	48.4

## Sheet: TableS5
Table S5. Pairwise uncorrected genetic distances of bdnf gene sequences for 92 taxa. Values in bold are within family/subfamily genetic distances.
	Family (subfamily)	1	2	3	4	5	6	7	8	9	10	11	12	13	14	15	16	17	18	19	20	21
1	Colubridae (Calamariinae)
2	Colubridae (Dipsadinae)	0.01–0.02	0.01–0.02
3	Colubridae (Pseudoxenodontinae)	0.02–0.04	0.01–0.03	0–0.04
4	Colubridae (Natricinae)	0.02	0.01–0.02	0.01–0.03
5	Colubridae (Colubrinae)	0.02–0.04	0.01–0.03	0.01–0.05	0.02–0.03	0–0.03
6	Colubridae (Grayiinae)	0.02	0.01–0.02	0.02–0.04	0.02	0.02–0.03
7	Elapidae	0.02–0.03	0.01–0.02	0.02–0.04	0.02–0.03	0.02–0.03	0.02–0.03	0–0.02
8	Elapidae (Hydrophiinae)	0.02	0.01	0.01–0.03	0.02	0.01–0.03	0.02	0.01
9	Elapidae (Laticaudinae)	0.02	0.01–0.02	0.02–0.04	0.02	0.02–0.03	0.02	0.01–0.02	0
10	Homalopsidae	0.02	0.01–0.02	0.02–0.04	0.02	0.02–0.03	0.02	0.02	0.02	0.02
11	Lamprophiidae (Lamprophiinae)	0.03	0.02–0.03	0.03–0.05	0.03	0.03–0.04	0.03	0.03	0.03	0.03	0.03
12	Lamprophiidae (Aparallactinae)	0.02	0.01–0.02	0.01–0.04	0.02	0.01–0.03	0.01–0.02	0.01–0.02	0.01	0.01–0.02	0.02	0.02	0.01
13	Lamprophiidae (Atractaspidinae)	0.02	0.01–0.02	0.01–0.03	0.02	0.02–0.03	0.02	0.01–0.02	0.01	0.02	0.02	0.03	0.01–0.02	0.01
14	Lamprophiidae (Psammophiinae)	0.02	0.01–0.02	0.02–0.04	0.02	0.02–0.03	0.02	0.01–0.02	0.01	0.02	0.02	0.03	0.02	0.02
15	Lamprophiidae (Pseudoxyrhophiinae)	0.02	0.01–0.02	0.02–0.04	0.02	0.02–0.03	0.02	0.02	0.01	0.01–0.02	0.02	0.02–0.03	0.01–0.02	0.02	0.02	0.02
16	Pareidae (Pareinae)	0.03–0.04	0.03–0.04	0.04–0.06	0.04	0.03–0.06	0.04–0.05	0.04–0.05	0.04	0.04	0.04–0.05	0.05–0.06	0.04	0.04	0.04	0.04	0.02
17	Pareidae (Xylophiinae subfam. nov.)	0.02	0.02–0.03	0.03–0.04	0.02	0.03–0.04	0.03	0.03–0.04	0.03	0.02	0.03	0.04	0.03	0.03	0.03	0.02–0.03	0.02–0.03	0.01
18	Viperidae (Azemiopinae)	0.02	0.01–0.02	0.01–0.03	0.02	0.02–0.03	0.02	0.02	0.01	0.02	0.02	0.03	0.01–0.02	0.02	0.02	0.01–0.02	0.03–0.04	0.02
19	Viperidae (Crotalinae)	0.02	0.01–0.02	0.02–0.04	0.02	0.02–0.04	0.02	0.02–0.03	0.02	0.02	0.02	0.03	0.02	0.02	0.02	0.02	0.03–0.04	0.02	0–0.01	0–0.01
20	Viperidae (Viperinae)	0.02–0.03	0.02	0.02–0.04	0.02	0.02–0.04	0.03	0.02–0.03	0.02	0.02	0.02–0.03	0.04	0.02–0.03	0.02	0.02–0.03	0.02–0.03	0.03–0.04	0.03	0.01	0.01–0.02	0.01
21	Xenodermidae	0.04–0.05	0.03–0.05	0.04–0.08	0.04–0.05	0.03–0.07	0.04–0.05	0.04–0.06	0.04–0.05	0.03–0.05	0.04–0.05	0.05–0.06	0.04–0.05	0.04–0.05	0.04–0.05	0.04–0.05	0.05–0.06	0.04–0.05	0.03–0.04	0.03–0.04	0.03–0.05	0.03

## Sheet: TableS6
Table S6. Pairwise uncorrected genetic distances of cmos gene sequences for 308 taxa. Values in bold are within family/subfamily genetic distances.
	Family(subfamily)	1	2	3	4	5	6	7	8	9	10	11	12	13	14	15	16	17	18	19	20	21	22	23	24	25	26	27
1	Colubridae(Ahaetullinae)	0.01–0.03
2	Colubridae(Calamariinae)	0.03–0.04	0.03
3	Colubridae(Colubrinae)	0.02–0.05	0.02–0.06	0–0.05
4	Colubridae(Dipsadinae)	0.02–0.06	0.02–0.06	0.01–0.07	0–0.06
5	Colubridae(Grayiinae)	0.03–0.04	0.03–0.04	0.03–0.05	0.03–0.06	0.04
6	Colubridae(Natricinae)	0.02–0.06	0.02–0.06	0.01–0.07	0–0.08	0.02–0.06	0–0.07
7	Colubridae(Pseudoxenodontinae)	0.03–0.04	0.03–0.04	0.03–0.05	0.03–0.06	0.04	0.03–0.06	0.01–0.05
8	Colubridae(Sibynophiinae)	0.03–0.05	0.02–0.05	0–0.07	0.02–0.07	0.03–0.04	0.03–0.06	0.04–0.06	0.04–0.05
9	Elapidae	0.03–0.05	0.03–0.06	0.02–0.07	0.02–0.07	0.03–0.05	0.02–0.07	0.03–0.06	0.04–0.05	0–0.06
10	Elapidae(Hydrophiinae)	0.03–0.08	0.03–0.09	0.02–0.1	0.02–0.1	0.02–0.09	0.02–0.1	0.03–0.09	0.03–0.09	0–0.09	0–0.09
11	Elapidae(Laticaudinae)	0.04–0.06	0.04–0.06	0.04–0.06	0.04–0.07	0.04–0.05	0.04–0.08	0.05	0.05–0.06	0.01–0.06	0.01–0.09	0–0.02
12	Homalopsidae	0.04–0.05	0.04–0.06	0.04–0.07	0.03–0.07	0.05	0.03–0.07	0.05–0.06	0.05–0.06	0.04–0.06	0.04–0.09	0.04–0.06	0.02–0.06
13	Lamprophiidae(Aparallactinae)	0.03–0.05	0.03–0.05	0.03–0.07	0.03–0.07	0.04–0.06	0.03–0.07	0.04–0.06	0.04–0.05	0.02–0.06	0.01–0.09	0.03–0.04	0.03–0.06	0.01–0.05
14	Lamprophiidae(Atractaspidinae)	0.04–0.06	0.05–0.06	0.04–0.07	0.04–0.07	0.05–0.06	0.04–0.07	0.05–0.06	0.05–0.06	0.03–0.06	0.02–0.09	0.04–0.05	0.04–0.06	0.03–0.06	0.02–0.03
15	Lamprophiidae(Colubroidea)	0.03–0.05	0.03–0.05	0.03–0.06	0.03–0.07	0.05	0.04–0.08	0.04–0.07	0.04–0.05	0.02–0.06	0.02–0.09	0.03–0.05	0.03–0.06	0.03–0.05	0.02–0.04	0–0.04
16	Lamprophiidae(Cyclocorinae)	0.02–0.05	0.03–0.05	0.02–0.06	0.01–0.06	0.03–0.05	0.02–0.06	0.04–0.06	0.03–0.05	0.02–0.05	0.01–0.08	0.02–0.05	0.03–0.04	0.03–0.05	0.02–0.04	0.02–0.05	0.01–0.04
17	Lamprophiidae(incertaesedis)	0.04–0.06	0.04–0.06	0.03–0.07	0.03–0.07	0.05–0.06	0.04–0.07	0.05–0.06	0.05–0.06	0.03–0.07	0.02–0.09	0.03–0.04	0.04–0.06	0.04–0.05	0.03–0.04	0.03–0.04	0.03–0.04	0.03–0.04
18	Lamprophiidae(Lamprophiinae)	0.04–0.06	0.03–0.07	0.03–0.08	0.02–0.07	0.04–0.05	0.03–0.08	0.04–0.07	0.04–0.06	0.02–0.06	0.03–0.09	0.03–0.06	0.04–0.07	0.03–0.06	0.02–0.05	0.03–0.06	0.03–0.05	0.04–0.05	0.01–0.05
19	Lamprophiidae(Prosymninae)	0.03–0.04	0.03–0.04	0.02–0.05	0.02–0.05	0.03	0.02–0.06	0.04–0.05	0.04	0.01–0.04	0.01–0.07	0.02–0.03	0.03–0.05	0.02–0.04	0.02–0.03	0.02–0.04	0.02–0.03	0.03–0.04	0.03–0.04	0.03
20	Lamprophiidae(Psammophiinae)	0.02–0.06	0.03–0.06	0.02–0.07	0.02–0.08	0.04–0.06	0.02–0.08	0.03–0.06	0.03–0.06	0.01–0.06	0–0.1	0.02–0.05	0.02–0.06	0.02–0.06	0.01–0.04	0.01–0.05	0.01–0.04	0.02–0.05	0.01–0.05	0.02–0.04	0–0.04
21	Lamprophiidae(Pseudoxyrhophiinae)	0.03–0.05	0.04–0.06	0.03–0.07	0.03–0.07	0.04–0.06	0.03–0.08	0.04–0.07	0.04–0.06	0.02–0.06	0.02–0.08	0.03–0.05	0.03–0.06	0.03–0.05	0.02–0.04	0.03–0.04	0.02–0.04	0.03–0.04	0.03–0.05	0.03–0.04	0.01–0.04	0–0.04
22	Pareatidae	0.05–0.09	0.05–0.09	0.05–0.1	0.04–0.11	0.05–0.09	0.05–0.11	0.06–0.1	0.06–0.09	0.05–0.1	0.04–0.11	0.06–0.1	0.06–0.09	0.06–0.1	0.05–0.09	0.05–0.09	0.04–0.08	0.05–0.09	0.06–0.1	0.06–0.09	0.04–0.1	0.05–0.1	0.01–0.09
23	Pareatidae(XY)	0.05–0.07	0.05–0.08	0.04–0.08	0.04–0.1	0.05–0.06	0.05–0.09	0.06–0.08	0.04–0.07	0.05–0.1	0.03–0.11	0.06–0.07	0.05–0.07	0.05–0.07	0.05–0.07	0.05–0.07	0.04–0.07	0.05–0.09	0.06–0.09	0.06	0.05–0.1	0.05–0.1	0.03–0.1	0.03–0.07
24	Viperidae(Azemiopinae)	0.04–0.05	0.05–0.06	0.03–0.06	0.02–0.06	0.04	0.03–0.07	0.05–0.06	0.04–0.05	0.04–0.06	0.03–0.06	0.05	0.04–0.05	0.04–0.05	0.04–0.05	0.04–0.06	0.03–0.05	0.05–0.06	0.05–0.07	0.05	0.04–0.05	0.04–0.05	0.05–0.08	0.04–0.05	0.05
25	Viperidae(Crotalinae)	0.03–0.06	0.02–0.07	0.01–0.07	0.02–0.08	0.03–0.05	0.02–0.07	0.04–0.06	0.02–0.07	0.03–0.07	0.02–0.08	0.04–0.06	0.05–0.06	0.04–0.07	0.04–0.07	0.04–0.07	0.03–0.06	0.04–0.06	0.04–0.07	0.04–0.07	0.03–0.07	0.04–0.07	0.04–0.08	0.05–0.06	0.04–0.07	0.01–0.06
26	Viperidae(Viperinae)	0.04–0.06	0.04–0.07	0.03–0.07	0.02–0.08	0.04–0.06	0.03–0.08	0.05–0.08	0.04–0.07	0.04–0.07	0.03–0.08	0.04–0.07	0.04–0.07	0.04–0.07	0.04–0.07	0.04–0.08	0.03–0.06	0.04–0.07	0.05–0.08	0.05–0.07	0.03–0.07	0.04–0.06	0.05–0.09	0.04–0.06	0.05–0.07	0.01–0.06	0.01–0.04
27	Xenodermidae	0.08–0.1	0.09–0.11	0.08–0.11	0.08–0.11	0.09–0.1	0.09–0.12	0.1–0.11	0.09–0.1	0.09–0.11	0.08–0.11	0.09–0.11	0.1–0.11	0.09–0.1	0.08–0.09	0.09–0.11	0.08–0.1	0.1	0.08–0.11	0.09–0.1	0.08–0.1	0.09–0.1	0.09–0.13	0.09–0.1	0.12–0.13	0.08–0.1	0.08–0.09	0.02–0.09

## Sheet: TableS7
Table S7. Pairwise Kimura 2–parameter genetic distances of bdnf gene sequences for 92 taxa. Values in bold are within family/subfamily genetic distances.
	Family (subfamily)	1	2	3	4	5	6	7	8	9	10	11	12	13	14	15	16	17	18	19	20	21
1	Colubridae (Calamariinae)
2	Colubridae (Dipsadinae)	0.01–0.02	0.01–0.02
3	Colubridae (Pseudoxenodontinae)	0.02–0.04	0.01–0.03	0–0.04
4	Colubridae (Natricinae)	0.02	0.01–0.02	0.01–0.03
5	Colubridae (Colubrinae)	0.02–0.04	0.01–0.03	0.01–0.05	0.02–0.03	0–0.03
6	Colubridae (Grayiinae)	0.02	0.01–0.02	0.02–0.04	0.02	0.02–0.03
7	Elapidae	0.02–0.03	0.01–0.02	0.02–0.05	0.02–0.03	0.02–0.04	0.02–0.03	0–0.02
8	Elapidae (Hydrophiinae)	0.02	0.01	0.01–0.03	0.02	0.01–0.03	0.02	0.01
9	Elapidae (Laticaudinae)	0.02	0.01–0.02	0.02–0.04	0.02	0.02–0.03	0.02	0.01–0.02	0.01
10	Homalopsidae	0.02	0.01–0.02	0.02–0.04	0.02	0.02–0.03	0.03	0.02	0.02	0.02
11	Lamprophiidae (Lamprophiinae)	0.03	0.02–0.03	0.03–0.05	0.03	0.03–0.04	0.03	0.03	0.03	0.03	0.03
12	Lamprophiidae (Aparallactinae)	0.02	0.01–0.02	0.01–0.04	0.02	0.01–0.03	0.01–0.02	0.01–0.02	0.01	0.01–0.02	0.02	0.02	0.01
13	Lamprophiidae (Atractaspidinae)	0.02	0.01–0.02	0.01–0.04	0.02	0.02–0.03	0.02	0.01–0.02	0.01	0.02	0.02	0.03	0.01–0.02	0.01
14	Lamprophiidae (Psammophiinae)	0.02	0.01–0.02	0.02–0.04	0.02	0.02–0.04	0.02	0.01–0.02	0.01	0.02	0.02	0.03	0.02	0.02
15	Lamprophiidae (Pseudoxyrhophiinae)	0.02	0.01–0.02	0.02–0.04	0.02	0.02–0.03	0.02	0.02	0.01	0.01–0.02	0.02	0.02–0.03	0.01–0.02	0.02	0.02	0.01–0.02
16	Pareidae (Pareinae)	0.03–0.04	0.03–0.05	0.04–0.07	0.04	0.04–0.06	0.04–0.05	0.04–0.05	0.04	0.04	0.04–0.05	0.05–0.06	0.04–0.05	0.04–0.05	0.04–0.05	0.04–0.05	0.02
17	Pareidae (Xylophiinae subfam. nov.)	0.02	0.02–0.03	0.03–0.05	0.02	0.03–0.05	0.03	0.03–0.04	0.03	0.02	0.03	0.04	0.03	0.03	0.03	0.03	0.02–0.03
18	Viperidae (Azemiopinae)	0.02	0.01–0.02	0.01–0.04	0.02	0.02–0.03	0.02	0.02	0.01	0.02	0.02	0.03	0.01–0.02	0.02	0.02	0.01–0.02	0.03–0.04	0.02
19	Viperidae (Crotalinae)	0.02	0.01–0.02	0.02–0.04	0.02	0.02–0.04	0.02–0.03	0.02–0.03	0.02	0.02	0.02	0.03–0.04	0.02	0.02	0.02–0.03	0.02	0.03–0.04	0.02	0–0.01	0–0.01
20	Viperidae (Viperinae)	0.03	0.02	0.02–0.04	0.02	0.02–0.04	0.03	0.02–0.03	0.02	0.02	0.02–0.03	0.04	0.02–0.03	0.02	0.03	0.02–0.03	0.03–0.05	0.03	0.01	0.01–0.02	0.01
21	Xenodermidae	0.04–0.06	0.03–0.05	0.04–0.08	0.04–0.06	0.03–0.07	0.04–0.06	0.04–0.06	0.04–0.05	0.04–0.05	0.04–0.05	0.05–0.07	0.04–0.06	0.04–0.06	0.04–0.05	0.04–0.06	0.05–0.07	0.04–0.05	0.03–0.04	0.03–0.05	0.04–0.05	0.03

## Sheet: TableS8
Table S8. Pairwise Kimura 2–parameter genetic distances of cmos gene sequences for 92 taxa. Values in bold are within family/subfamily genetic distances.
	Family(subfamily)	1	2	3	4	5	6	7	8	9	10	11	12	13	14	15	16	17	18	19	20	21	22	23	24	25	26	27
1	Colubridae(Ahaetullinae)	0.01–0.03
2	Colubridae(Calamariinae)	0.03–0.04	0.03
3	Colubridae(Colubrinae)	0.02–0.05	0.02–0.06	0–0.05
4	Colubridae(Dipsadinae)	0.02–0.06	0.02–0.06	0.01–0.07	0–0.07
5	Colubridae(Grayiinae)	0.03–0.04	0.03–0.05	0.03–0.06	0.03–0.06	0.04
6	Colubridae(Natricinae)	0.02–0.06	0.02–0.07	0.01–0.07	0–0.08	0.02–0.06	0–0.07
7	Colubridae(Pseudoxenodontinae)	0.03–0.04	0.03–0.05	0.03–0.06	0.03–0.06	0.04	0.03–0.07	0.01–0.06
8	Colubridae(Sibynophiinae)	0.03–0.05	0.02–0.05	0–0.08	0.02–0.07	0.03–0.04	0.03–0.07	0.04–0.06	0.04–0.05
9	Elapidae	0.03–0.06	0.03–0.06	0.02–0.07	0.02–0.08	0.03–0.06	0.02–0.08	0.04–0.06	0.04–0.06	0–0.07
10	Elapidae(Hydrophiinae)	0.03–0.09	0.03–0.09	0.02–0.1	0.02–0.11	0.02–0.09	0.02–0.11	0.03–0.09	0.03–0.09	0–0.1	0–0.1
11	Elapidae(Laticaudinae)	0.04–0.06	0.04–0.06	0.04–0.07	0.04–0.07	0.04–0.05	0.04–0.08	0.05–0.06	0.05–0.06	0.01–0.07	0.01–0.1	0–0.02
12	Homalopsidae	0.04–0.06	0.04–0.06	0.04–0.07	0.03–0.07	0.05	0.04–0.08	0.05–0.06	0.05–0.06	0.04–0.06	0.04–0.09	0.05–0.06	0.02–0.06
13	Lamprophiidae(Aparallactinae)	0.03–0.06	0.03–0.06	0.03–0.07	0.03–0.08	0.04–0.06	0.03–0.07	0.04–0.06	0.04–0.05	0.02–0.07	0.01–0.09	0.03–0.04	0.03–0.06	0.01–0.06
14	Lamprophiidae(Atractaspidinae)	0.05–0.06	0.05–0.07	0.04–0.07	0.04–0.08	0.05–0.06	0.04–0.08	0.05–0.06	0.05–0.06	0.03–0.07	0.02–0.1	0.04–0.05	0.04–0.07	0.03–0.06	0.02
15	Lamprophiidae(Colubroidea)	0.03–0.06	0.03–0.06	0.03–0.07	0.03–0.07	0.05	0.04–0.09	0.05–0.08	0.04–0.06	0.02–0.06	0.02–0.1	0.03–0.06	0.03–0.06	0.03–0.06	0.02–0.04	0–0.04
16	Lamprophiidae(Cyclocorinae)	0.02–0.05	0.03–0.05	0.02–0.06	0.01–0.07	0.03–0.05	0.02–0.07	0.04–0.06	0.04–0.05	0.02–0.05	0.01–0.08	0.02–0.05	0.03–0.05	0.03–0.05	0.02–0.04	0.02–0.05	0.01–0.04
17	Lamprophiidae(incertaesedis)	0.04–0.06	0.04–0.07	0.04–0.07	0.04–0.08	0.05–0.06	0.04–0.08	0.05–0.06	0.05–0.06	0.03–0.08	0.02–0.09	0.03–0.04	0.04–0.07	0.04–0.06	0.03–0.05	0.03–0.04	0.03–0.05	0.04–0.05
18	Lamprophiidae(Lamprophiinae)	0.04–0.06	0.04–0.07	0.03–0.08	0.03–0.08	0.04–0.06	0.03–0.09	0.05–0.08	0.04–0.06	0.02–0.06	0.03–0.09	0.03–0.06	0.04–0.07	0.03–0.07	0.02–0.05	0.03–0.06	0.03–0.06	0.04–0.06	0.01–0.05
19	Lamprophiidae(Prosymninae)	0.03–0.04	0.03–0.05	0.02–0.06	0.02–0.05	0.03	0.02–0.06	0.04–0.05	0.04	0.01–0.04	0.01–0.07	0.02–0.03	0.03–0.05	0.02–0.05	0.02–0.03	0.02–0.04	0.02–0.03	0.03–0.04	0.03–0.04	0.03
20	Lamprophiidae(Psammophiinae)	0.02–0.06	0.03–0.07	0.02–0.07	0.02–0.08	0.04–0.06	0.02–0.08	0.04–0.07	0.03–0.06	0.01–0.07	0–0.1	0.02–0.05	0.03–0.06	0.02–0.06	0.01–0.04	0.01–0.05	0.01–0.04	0.02–0.05	0.01–0.05	0.02–0.04	0–0.04
21	Lamprophiidae(Pseudoxyrhophiinae)	0.03–0.05	0.04–0.06	0.03–0.07	0.03–0.07	0.04–0.06	0.03–0.09	0.05–0.07	0.04–0.06	0.02–0.06	0.02–0.09	0.03–0.05	0.03–0.06	0.03–0.05	0.02–0.04	0.03–0.04	0.02–0.04	0.03–0.04	0.03–0.05	0.03–0.04	0.01–0.04	0–0.04
22	Pareatidae	0.05–0.09	0.05–0.1	0.05–0.11	0.05–0.12	0.06–0.1	0.05–0.12	0.06–0.11	0.06–0.1	0.05–0.11	0.04–0.12	0.06–0.11	0.06–0.1	0.06–0.1	0.05–0.1	0.05–0.1	0.04–0.09	0.06–0.09	0.06–0.11	0.06–0.09	0.05–0.1	0.05–0.1	0.01–0.1
23	Pareatidae(XY)	0.05–0.07	0.05–0.09	0.04–0.09	0.04–0.11	0.06	0.05–0.09	0.06–0.09	0.04–0.07	0.05–0.11	0.04–0.12	0.06–0.08	0.05–0.08	0.06–0.08	0.06–0.07	0.05–0.07	0.04–0.08	0.05–0.1	0.06–0.1	0.06–0.07	0.05–0.1	0.05–0.1	0.04–0.11	0.03–0.08
24	Viperidae(Azemiopinae)	0.05	0.05–0.06	0.03–0.06	0.02–0.07	0.04	0.04–0.07	0.06	0.04–0.05	0.04–0.07	0.03–0.07	0.05–0.06	0.04–0.06	0.05	0.04–0.05	0.04–0.07	0.03–0.05	0.05–0.06	0.05–0.07	0.06	0.04–0.06	0.04–0.06	0.05–0.08	0.04–0.06	0.05
25	Viperidae(Crotalinae)	0.03–0.07	0.02–0.07	0.01–0.07	0.02–0.08	0.03–0.06	0.02–0.08	0.04–0.06	0.02–0.07	0.03–0.08	0.02–0.09	0.04–0.07	0.05–0.07	0.05–0.08	0.04–0.07	0.04–0.07	0.03–0.06	0.04–0.07	0.04–0.08	0.05–0.07	0.03–0.08	0.04–0.07	0.05–0.09	0.05–0.06	0.04–0.07	0.01–0.06
26	Viperidae(Viperinae)	0.04–0.07	0.05–0.08	0.03–0.08	0.02–0.08	0.04–0.06	0.04–0.09	0.05–0.08	0.04–0.07	0.04–0.07	0.03–0.08	0.05–0.07	0.04–0.07	0.04–0.07	0.04–0.07	0.04–0.08	0.03–0.07	0.04–0.08	0.05–0.09	0.05–0.07	0.04–0.07	0.04–0.07	0.05–0.09	0.04–0.07	0.05–0.08	0.01–0.06	0.01–0.04
27	Xenodermidae	0.09–0.11	0.1–0.11	0.09–0.12	0.09–0.13	0.1–0.11	0.09–0.14	0.11–0.12	0.1–0.11	0.1–0.12	0.09–0.11	0.1–0.11	0.1–0.12	0.1–0.11	0.09–0.1	0.1–0.11	0.09–0.11	0.1–0.11	0.09–0.12	0.1	0.08–0.1	0.09–0.11	0.1–0.14	0.09–0.11	0.14–0.15	0.09–0.1	0.09–0.1	0.03–0.09
